# Supplementary material
Source: PubMed Central journal article supplement (PMC8985738)

**Supplemental Figure.** Message Impact Framework for Cigarillo Warnings

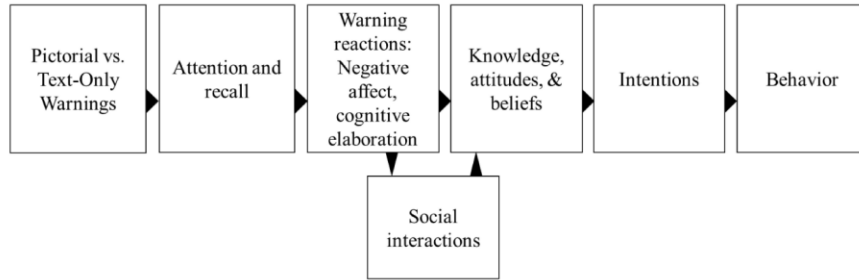

Supplement: NIHMS1789000-supplement-1.pdf [file NIHMS1789000-supplement-1.pdf]
